# Supplementary material for: High Resolution Methylome Map of Rat Indicates Role of Intragenic DNA Methylation in Identification of Coding Region
Source: PLoS One. 2012 Feb 15;7(2):e31621. doi: 10.1371/journal.pone.0031621 (PMC3280313; doi:10.1371/journal.pone.0031621)
Supplement: Excel S2 — List of proteins found in proteomics study. Proteins with their accession Ids and related information. (XLSX) [file pone.0031621.s018.xlsx]

## Sheet: Sheet1
Accession #	#AAs	MW [Da]	Description	ΣCoverage	Σ# Peptides	Score A2	Coverage A2	# Peptides A2	Score B2	Coverage B2	# Peptides B2	Score C2	Coverage C2	# Peptides C2	Score D2	Coverage D2	# Peptides D2	Score E2	Coverage E2	# Peptides E2
IPI:IPI00230897.5	147	15969.2	Hemoglobin subunit beta-1	72.79	43	29.4438	65.31	10	27.2782	58.5	9	13.1069	37.41	4	21.709	53.74	8	28.8949	46.94	12
IPI:IPI00231192.5	147	15972.3	Hemoglobin subunit beta-2	71.43	42	29.7862	63.95	10	16.8564	45.58	6	12.2258	36.05	4	25.1388	65.31	9	31.6015	58.5	13
IPI:IPI00287835.7	142	15318.8	Hemoglobin subunit alpha-1/2	64.08	33	33.5079	58.45	9	22.7021	52.11	6	13.2048	43.66	4	14.3691	43.66	5	25.7989	40.14	9
IPI:IPI00231013.2	100	11399.6	Isoform Short of Cytochrome b5	55	5													12.1314	55	5
IPI:IPI00411230.3	218	25686	Glutathione S-transferase Mu 2	51.38	29	13.2804	25.69	5	2.11251	0					21.1175	39.91	9	46.3977	40.83	15
IPI:IPI00190790.1	127	14263.3	Fatty acid-binding protein, liver	51.18	15	10.6281	28.35	4				4.2718	16.54	2	8.59499	17.32	3	17.9633	51.18	6
IPI:IPI00191737.6	608	68686.1	Serum albumin	48.68	82	56.9158	29.11	17	118.081	48.68	39	77.4151	37.5	24	4.1133	4.11	2
IPI:IPI00197696.2	338	35660.8	Malate dehydrogenase, mitochondrial	47.63	25	12.5185	16.86	5	11.7965	17.16	4	8.83384	10.65	3	36.7425	41.12	13
IPI:IPI00231742.5	527	59719.5	Catalase	45.35	44	24.3172	20.11	9	54.1472	37	17	53.8282	36.81	17	2.11684	2.85	1
IPI:IPI00231643.5	154	15901.8	Superoxide dismutase [Cu-Zn]	43.51	18	2.08862	8.44	1	5.41366	15.58	2	10.101	29.22	4	8.98096	25.32	3	23.4419	43.51	8
IPI:IPI00551812.1	529	56318.5	ATP synthase subunit beta, mitochondrial	42.91	65	35.5547	25.71	11	76.0864	39.51	27	74.8158	39.51	22	13.368	9.26	4	2.09934	2.27	1
IPI:IPI00231639.7	218	25897.1	Glutathione S-transferase Mu 1	42.2	25	5.08235	9.63	2	2.30785	0		3.77412	5.5	1	22.6464	35.78	9	35.6315	34.86	13
IPI:IPI00948721.1	396	41727.5	42 kDa protein	41.16	51	32.4048	23.48	11	35.4567	28.79	11	41.6942	33.84	11	44.2518	29.29	14	13.2489	10.61	4
IPI:IPI00210644.1	1500	164476	Carbamoyl-phosphate synthase [ammonia], mitochondrial	41	125	231.036	34.73	67	123.519	30.93	43	16.9107	5.4	7	10.149	2.33	3	10.4079	2.67	5
IPI:IPI00325189.4	152	17271.9	Nucleoside diphosphate kinase B	40.79	5	2.05639	6.58	1										11.7011	34.21	4
IPI:IPI00324633.2	558	61377.3	Glutamate dehydrogenase 1, mitochondrial	38.89	49	37.4635	25.27	12	40.6786	27.24	11	55.6039	32.8	19	7.82063	6.63	3	7.68838	8.42	4
IPI:IPI00561052.3	103	11360.4	Isoform Histone H4 of Histone H4	38.83	6	6.9051	27.18	3							1.66213	0		6.93881	31.07	3
IPI:IPI00208205.1	646	70827.2	Heat shock cognate 71 kDa protein	38.24	31	7.83962	6.66	3	84.2891	38.24	28
IPI:IPI00201413.1	397	41844.5	3-ketoacyl-CoA thiolase, mitochondrial	38.04	57	36.1099	25.44	13	38.854	30.73	12	42.4661	30.73	11	47.9104	31.23	16	15.0335	12.59	5
IPI:IPI00480679.4	423	47732.3	Keratin, type I cytoskeletal 18	35.7	35	12.3596	8.98	5	20.5646	17.49	6	48.2965	35.7	16	18.8843	15.37	6	3.60212	1.65	2
IPI:IPI00210920.1	430	47284.1	Aspartate aminotransferase, mitochondrial	34.42	31	29.0058	28.37	10	16.139	15.81	6	16.2975	12.56	5	31.8196	23.95	10
IPI:IPI00332027.7	407	44947.8	Betaine--homocysteine S-methyltransferase 1	33.91	32	28.0414	28.99	8	30.2047	29.48	8	23.7742	26.78	6	22.6912	23.59	6	8.73519	10.57	4
IPI:IPI00471911.7	364	39593.2	Fructose-bisphosphate aldolase B	33.79	41	27.676	26.65	8	17.7254	19.23	6	32.0826	24.73	9	49.2732	33.79	17	2.32962	3.57	1
IPI:IPI00366293.3	297	33385.8	Thiosulfate sulfurtransferase	33.67	24	7.87705	10.44	2	8.78428	13.8	4	17.2008	23.91	7	32.4565	33.67	11
IPI:IPI00206624.1	654	72302.4	78 kDa glucose-regulated protein	33.64	26	3.56803	1.68	1	74.3918	33.64	25
IPI:IPI00189819.1	375	41709.7	Actin, cytoplasmic 1	33.6	40	20.5886	23.2	8	32.4853	27.47	10	25.8272	25.33	9	32.6956	25.6	13
IPI:IPI00396910.1	553	59716.6	ATP synthase subunit alpha, mitochondrial	33.27	44	24.2031	16.27	7	31.8249	23.51	11	42.4156	29.66	15	19.3804	16.27	7	8.6638	8.68	4
IPI:IPI00370596.2	424	43792.7	3-ketoacyl-CoA thiolase B, peroxisomal	32.55	12				3.55176	4.48	1	7.57697	10.61	4	21.9981	24.53	7
IPI:IPI00197770.1	519	56452.7	Aldehyde dehydrogenase, mitochondrial	31.6	29	16.877	16.76	7	37.2711	21.97	13	28.8487	18.69	9	0	0
IPI:IPI00679202.2	698	76345.6	Isoform 1 of Serotransferrin	31.38	22	3.97108	1.29	1	61.5473	31.38	21
IPI:IPI00886470.2	271	28344.2	3-hydroxyacyl-CoA dehydrogenase type-2	31.37	10	16.4976	31.37	6	2.64815	4.43	1	3.00193	4.43	1	5.19294	8.49	2
IPI:IPI00205332.4	333	34929.5	Electron transfer flavoprotein subunit alpha, mitochondrial	30.63	10				2.06603	3.9	1	2.42848	5.41	1	22.6452	30.63	8
IPI:IPI00948083.1	59	6656.53	7 kDa protein	30.51	2													3.69232	30.51	2
IPI:IPI00205018.3	535	57770.6	Methylmalonate-semialdehyde dehydrogenase [acylating], mitochondrial	30.47	33	16.6897	14.58	6	42.5662	28.97	15	34.6692	22.06	11	2.07922	1.87	1	0	0
IPI:IPI00231963.5	118	13124.8	D-dopachrome decarboxylase	29.66	6	6.22305	29.66	3							5.23842	12.71	1	5.39477	19.49	2
IPI:IPI00950491.1	351	39398.5	Otc protein	29.63	25	23.9679	24.22	7	12.4905	13.68	5	8.30424	9.97	3	21.439	25.64	9	2.08336	3.99	1
IPI:IPI00358005.1	599	66346.4	Choline dehydrogenase	29.55	27	8.24111	6.51	4	48.4817	25.54	15	21.7081	14.69	8
IPI:IPI00339148.2	573	60917.4	60 kDa heat shock protein, mitochondrial	29.49	40	19.6185	18.5	7	40.9075	25.31	13	53.6151	26.53	17	4.73368	3.66	2	1.85582	1.57	1
IPI:IPI00896756.1	106	11593.5	Ig kappa chain C region, B allele	28.3	3													8.69246	28.3	3
IPI:IPI00215574.5	289	32234	3,2-trans-enoyl-CoA isomerase, mitochondrial	27.68	22	22.6228	27.68	8	12.3128	15.22	4	2.7773	5.54	1	10.2735	16.61	4	11.7107	14.88	5
IPI:IPI00324302.3	424	44666.4	Acetyl-CoA acetyltransferase, mitochondrial	27.59	18	10.9805	12.26	4	9.19808	11.08	3	8.90576	11.08	3	20.5339	24.76	8
IPI:IPI00210444.5	508	56875.6	Hydroxymethylglutaryl-CoA synthase, mitochondrial	27.17	48	39.4632	25.2	12	39.3279	23.82	12	46.7835	27.17	16	9.50477	7.48	4	10.8318	7.87	4
IPI:IPI00211225.1	430	47842.4	Long-chain specific acyl-CoA dehydrogenase, mitochondrial	26.98	14	28.3771	26.98	10				5.4126	5.81	2	5.54968	5.12	2	1.62729	0
IPI:IPI00212622.2	763	82612.5	Trifunctional enzyme subunit alpha, mitochondrial	26.61	26	20.3238	12.19	7	50.4161	26.61	17	3.97435	2.1	1	2.68292	2.1	1
IPI:IPI00232011.9	722	78608.3	Peroxisomal bifunctional enzyme	25.76	23	39.1232	25.76	17	15.1826	9.28	6
IPI:IPI00207217.1	290	31496.2	Enoyl-CoA hydratase, mitochondrial	25.52	8							4.15056	7.24	1	5.58196	7.59	2	14.9107	15.17	5
IPI:IPI00198887.1	509	56915.7	Protein disulfide-isomerase	25.15	17	3.86603	3.73	2	12.3985	10.22	5	26.3681	21.81	10
IPI:IPI00327518.5	323	34951.3	Arginase-1	25.08	17	5.80892	8.36	3	11.034	12.38	4	9.57116	9.29	3	16.5832	15.17	6	2.02661	3.41	1
IPI:IPI00363265.3	679	73811.9	Stress-70 protein, mitochondrial	24.74	14				42.5523	24.74	14
IPI:IPI00364321.3	255	27670.1	Electron transfer flavoprotein subunit beta	24.71	8	19.421	24.71	5	2.91351	8.24	1				1.99462	3.92	1	7.09221	3.92	1
IPI:IPI00389571.6	483	53985.3	Keratin, type II cytoskeletal 8	24.64	39	12.2521	9.73	4	20.5028	15.94	8	45.0775	24.64	15	25.0498	17.81	10	6.6443	2.07	2
IPI:IPI00231767.5	249	26831.7	Triosephosphate isomerase	24.5	5							0	0					12.0306	24.5	5
IPI:IPI00339188.2	286	32561.3	3-hydroxyanthranilate 3,4-dioxygenase	24.13	6										14.194	24.13	6
IPI:IPI00211779.1	199	22095.3	Peroxiredoxin-1	23.62	9	1.84127	5.03	1	1.68511	0		2.31532	5.53	1	10.1881	19.6	4	9.4014	14.07	3
IPI:IPI00326433.11	102	10894.9	10 kDa heat shock protein, mitochondrial	23.53	2													7.35164	23.53	2
IPI:IPI00188989.1	699	78128.2	Long-chain-fatty-acid--CoA ligase 1	22.89	16	42.2256	22.89	15	7.21003	1.29	1
IPI:IPI00231745.8	363	39584.1	Fructose-1,6-bisphosphatase 1	22.87	10	15.6899	19.56	5	2.18775	3.03	1	2.02809	3.03	1	7.55749	9.37	3
IPI:IPI00471584.7	724	83229.1	Heat shock protein HSP 90-beta	22.79	24	22.3491	11.19	7	44.6034	21.55	15	6.93805	3.59	2
IPI:IPI00231292.7	137	14294.6	Ribonuclease UK114	22.63	6	2.26388	7.3	1							4.37267	14.6	2	10.82	22.63	3
IPI:IPI00231150.4	226	25971.7	Glutathione S-transferase (Fragment)	22.57	17	9.98276	8.85	2	2.59166	4.87	1	4.10329	8.85	2	15.4816	19.47	6	21.4552	19.03	6
IPI:IPI00211100.1	322	37003.9	3-alpha-hydroxysteroid dehydrogenase	22.05	16	6.9062	4.66	2	12.7212	10.56	5				22.6134	22.05	9
IPI:IPI00923141.1	232	25514.1	Isoform 2 of Adenylate kinase 2, mitochondrial	21.98	7										10.8538	17.24	4	10.2507	11.64	3
IPI:IPI00948302.1	298	32975.1	ATP synthase gamma chain	21.81	8	2.27108	4.03	1							15.235	21.81	6	2.03833	4.03	1
IPI:IPI00211127.1	412	46466.9	Argininosuccinate synthase	21.6	24	21.5656	13.59	7	20.5404	15.78	6	29.9608	16.02	10	3.64574	3.16	1
IPI:IPI00194550.5	398	43577.3	Cystathionine gamma-lyase	21.36	9	25.9332	21.36	9
IPI:IPI00197711.1	332	36427.3	L-lactate dehydrogenase A chain	21.08	13	17.3224	18.37	6	8.56059	9.04	3	2.15747	2.71	1	10.7774	8.43	3
IPI:IPI00551802.6	125	13981.6	Histone H2B type 1	20.8	4	1.90665	7.2	1				1.68389	0		3.08267	0		11.6743	13.6	3
IPI:IPI00324741.3	505	56587.7	Protein disulfide-isomerase A3	20.79	17	8.83758	6.93	4	13.9424	9.11	4	23.5583	20.59	9
IPI:IPI00210435.2	1178	129695	Pyruvate carboxylase, mitochondrial	20.63	37	51.1321	16.81	16	65.1389	18.25	21
IPI:IPI00195372.1	462	50082.1	Elongation factor 1-alpha 1	20.56	23	20.9036	15.37	7	14.6043	16.02	6	18.3538	15.37	8	1.93613	1.73	1	2.36017	2.6	1
IPI:IPI00230838.5	161	18751.6	ATP synthase subunit d, mitochondrial	20.5	3													8.03435	20.5	3
IPI:IPI00361887.1	128	13500.5	H2A histone family, member V	20.31	7	4.36439	12.5	2	0	0					4.44249	12.5	2	7.00545	20.31	3
IPI:IPI00870151.2	577	65315.5	Bucs1 protein	19.93	10	4.1756	1.91	1	21.8091	19.93	8	5.00539	2.43	1
IPI:IPI00230942.5	218	25664	Glutathione S-transferase Yb-3	19.72	12	4.18032	9.63	2	2.11251	0					7.84898	13.3	3	22.694	19.72	7
IPI:IPI00921682.2	562	61788.6	aldehyde dehydrogenase 4A1	19.4	19	11.3729	6.05	3	22.1646	17.97	9	24.159	13.35	7
IPI:IPI00195516.6	460	51318.3	Hemopexin	19.35	8				23.7469	19.35	8
IPI:IPI00207941.1	857	95987.5	Dimethylglycine dehydrogenase, mitochondrial	19.25	18	10.8741	4.43	3	41.2009	19.25	15
IPI:IPI00896213.1	322	35163.4	Ig gamma-2A chain C region	18.94	8	2.05067	3.11	1	3.46054	3.11	1	14.5643	18.94	6
IPI:IPI00208026.1	472	52498.5	Selenium-binding protein 1	18.86	10	6.39074	6.78	3	4.68355	2.33	1	18.7623	18.86	6
IPI:IPI00230937.5	187	20788.4	Phosphatidylethanolamine-binding protein 1	18.72	3										4.26174	11.76	2	3.49113	6.95	1
IPI:IPI00203690.5	521	56432.6	4-trimethylaminobutyraldehyde dehydrogenase	18.62	14	15.6359	14.4	6	2.12646	1.92	1	26.0257	14.97	7
IPI:IPI00190701.5	312	35731.3	Apolipoprotein E	18.59	5										12.2679	18.59	5
IPI:IPI00231426.6	417	44510	Phosphoglycerate kinase 1	18.47	8				2.50581	4.08	1	8.25055	3.6	3	12.7323	14.39	4
IPI:IPI00210823.1	326	37354.1	3-oxo-5-beta-steroid 4-dehydrogenase	18.4	15	10.8214	11.04	4	5.80784	8.28	3	4.01595	5.83	2	11.4914	12.88	5	2.24186	2.76	1
IPI:IPI00389611.3	299	33368.4	Regucalcin	18.39	10	2.07764	4.35	1	2.02917	4.35	1	7.92039	15.05	3	16.0968	18.39	5
IPI:IPI00202658.1	335	35279.6	3-hydroxyisobutyrate dehydrogenase, mitochondrial	18.21	4										11.4495	18.21	4
IPI:IPI00395281.1	616	68154.7	Electron transfer flavoprotein-ubiquinone oxidoreductase, mitochondrial	18.18	12	4.908	3.9	2	34.5419	16.23	10
IPI:IPI00400573.1	445	49769	Tubulin beta-2C chain	17.98	17				23.6863	12.58	10	15.007	12.58	6	3.27878	2.25	1
IPI:IPI00464815.11	434	47098.2	Alpha-enolase	17.74	10	8.6784	9.22	3	2.3799	2.76	1	19.7504	13.59	6
IPI:IPI00195593.1	658	74063.4	Carnitine O-palmitoyltransferase 2, mitochondrial	17.63	10				25.5136	17.63	10
IPI:IPI00207601.1	370	40942.2	Hydroxyacid oxidase 1	17.57	6	2.7743	4.05	1	1.94796	4.05	1				9.62074	13.51	4
IPI:IPI00566655.2	58	6635.27	similar to glyceraldehyde-3-phosphate dehydrogenase	17.24	1										1.826	17.24	1
IPI:IPI00476295.7	432	47507.2	Adenosylhomocysteinase	17.13	11	18.7806	17.13	7				7.59503	8.1	3	1.82522	1.85	1
IPI:IPI00209807.21	919	101376	Sarcosine dehydrogenase, mitochondrial	17.08	15	9.31736	5.22	4	35.3395	16	11
IPI:IPI00923129.1	301	32515.5	Isoform B0a of Heterogeneous nuclear ribonucleoproteins A2/B1	16.94	4										7.66228	11.63	3	3.7877	5.32	1
IPI:IPI00231978.5	71	8249.48	ATP synthase subunit e, mitochondrial	16.9	1	2.33496	16.9	1
IPI:IPI00326561.3	327	36148.4	Delta(3,5)-Delta(2,4)-dienoyl-CoA isomerase, mitochondrial	16.82	8	2.43927	3.36	1	2.82309	3.36	1	2.64878	3.36	1	15.8705	16.82	5
IPI:IPI00198467.1	475	51381.5	Trifunctional enzyme subunit beta, mitochondrial	16.42	16	5.3946	1.89	1	10.7355	10.74	5	21.9474	16.42	8	4.46085	4.63	2
IPI:IPI00372498.1	578	59406.3	Bifunctional ATP-dependent dihydroxyacetone kinase/FAD-AMP lyase (cyclizing)	16.26	8	22.0231	16.26	8
IPI:IPI00210566.3	733	84761.8	Heat shock protein HSP 90-alpha	16.23	16	10.6599	5.05	3	35.1425	16.23	12	4.13535	1.91	1
IPI:IPI00194042.3	111	12293.3	Cytochrome c oxidase subunit 6A1, mitochondrial	16.22	3	0	0											10.1237	16.22	3
IPI:IPI00194045.1	414	46704.5	Isocitrate dehydrogenase [NADP] cytoplasmic	16.18	11	6.65612	5.8	2	4.32031	5.31	2	18.4656	13.53	6	3.12456	3.14	1
IPI:IPI00213659.3	335	36109.7	2,4-dienoyl-CoA reductase, mitochondrial	16.12	11	14.6257	16.12	5	2.97592	6.57	1				9.97233	16.12	4	2.05916	6.57	1
IPI:IPI00231648.5	293	32528.4	Glycine N-methyltransferase	16.04	5	1.84034	6.83	1				2.13991	6.83	1	7.91385	16.04	3
IPI:IPI00364046.2	449	49905.5	Tubulin alpha-1C chain	16.04	11	3.50364	3.12	1	17.7401	12.03	5	9.75013	12.69	4	2.23549	3.12	1
IPI:IPI00196725.5	902	99063.7	10-formyltetrahydrofolate dehydrogenase	15.96	16	20.9322	7.65	6	31.5363	12.97	9	2.14684	1.66	1
IPI:IPI00201500.8	151	16248.5	40S ribosomal protein S14	15.89	2													4.6255	15.89	2
IPI:IPI00760117.1	221	24731.4	Isoform 2 of Catechol O-methyltransferase	15.84	4							0	0		1.83371	4.07	1	10.5221	11.76	3
IPI:IPI00231611.7	507	54429	Isoform Mitochondrial of Fumarate hydratase, mitochondrial	15.78	6							16.7172	15.78	6				1.60685	0
IPI:IPI00207010.2	420	46435	Bile acid-CoA:amino acid N-acyltransferase	15.71	7	25.1021	15.71	7
IPI:IPI00327830.3	135	15049.5	Fatty acid-binding protein, epidermal	15.56	2													4.31613	15.56	2
IPI:IPI00205157.1	314	34425.9	Hydroxyacyl-coenzyme A dehydrogenase, mitochondrial	15.29	11	8.949	10.19	3	2.50688	3.18	1	2.22726	3.18	1	11.5938	15.29	5	3.49376	2.87	1
IPI:IPI00231139.6	655	71113.3	transketolase	15.27	11	10.4186	9.01	3	24.0619	15.27	8
IPI:IPI00560967.2	321	34442.9	N-acetylneuraminate pyruvate lyase 2	15.26	9	5.41635	7.79	2	5.85547	11.53	3	1.74028	0		10.5429	15.26	4
IPI:IPI00370752.3	276	30681.7	Omega-amidase NIT2	15.22	5	3.02109	3.62	1	2.50674	5.43	1				10.0575	15.22	3
IPI:IPI00331983.5	376	39619.5	Alcohol dehydrogenase 1	15.16	13	23.4919	13.03	5	9.80476	10.11	3	4.90757	4.79	2	9.2803	7.45	3
IPI:IPI00200466.3	298	32880.1	ADP/ATP translocase 2	15.1	5	13.0168	15.1	5
IPI:IPI00365985.5	804	92713.4	Isoform 1 of Endoplasmin	15.05	19	13.2069	7.71	5	39.7343	15.05	13	4.5668	1.49	1
IPI:IPI00950672.1	779	85141.9	85 kDa protein	14.89	11	2.34331	1.93	1	29.3197	14.89	10
IPI:IPI00764082.1	101	11072.1	similar to histone 2a	14.85	4	2.53554	8.91	1	0	0					2.48452	8.91	1	5.39209	14.85	2
IPI:IPI00480620.1	344	38308.4	3-hydroxybutyrate dehydrogenase, type 1	14.83	6	2.68319	3.2	1				1.8218	2.03	1	15.6106	12.79	4
IPI:IPI00204311.1	223	25187.3	Adenylate kinase isoenzyme 4, mitochondrial	14.8	3													8.08528	14.8	3
IPI:IPI00193716.1	424	46405.8	Isovaleryl-CoA dehydrogenase, mitochondrial	14.62	7	0	0		3.18534	2.36	1	3.94888	2.83	1	13.139	12.26	5
IPI:IPI00193258.7	453	51789.3	Phenylalanine-4-hydroxylase	14.57	8	2.25744	1.55	1	2.01171	2.43	1	14.1185	14.57	6	1.61102	0
IPI:IPI00392676.4	206	22080.3	Biliverdin reductase B	14.56	5										2.02664	4.85	1	8.28923	14.56	4
IPI:IPI00373140.2	165	18507.5	similar to destrin	14.55	2													4.67162	14.55	2
IPI:IPI00212014.3	806	89292.7	Transitional endoplasmic reticulum ATPase	14.52	11	3.10723	1.49	1	27.4665	14.52	10
IPI:IPI00560769.2	69	7047.83	similar to T-complex protein 1 subunit zeta-2	14.49	1										1.83622	14.49	1
IPI:IPI00193049.1	291	33884	Sulfotransferase 1A1	14.43	4	1.60348	0								10.5926	14.43	4
IPI:IPI00231106.5	297	32919.4	3-mercaptopyruvate sulfurtransferase	14.14	6	3.01405	5.05	1							14.0496	14.14	5
IPI:IPI00231346.5	115	12775.7	60S ribosomal protein L30	13.91	1	2.12576	13.91	1
IPI:IPI00214480.1	419	45946	Fumarylacetoacetase	13.84	9	1.96192	2.86	1	4.15592	6.44	2	3.77485	5.01	2	8.33573	10.26	4
IPI:IPI00214801.3	1091	119627	Isoform 2 of ATP-citrate synthase	13.84	14	27.8216	12.56	11	8.86007	3.76	3
IPI:IPI00198717.8	334	36460	Malate dehydrogenase, cytoplasmic	13.77	7	5.71798	6.29	2							10.5996	13.77	5	1.66124	0
IPI:IPI00211989.3	298	32728.5	Isoform C of Ketohexokinase	13.76	5	3.45244	5.7	1							13.9042	13.76	4
IPI:IPI00198620.1	168	17584.2	ATP synthase subunit delta, mitochondrial	13.69	2													5.28005	13.69	2
IPI:IPI00194222.1	169	19502.1	Cytochrome c oxidase subunit 4 isoform 1, mitochondrial	13.61	2	4.31574	13.61	2
IPI:IPI00231359.3	414	44939	Acetyl-Coenzyme A dehydrogenase, short chain, isoform CRA_a	13.53	9				1.6738	0		8.06904	6.04	3	16.5633	13.53	6
IPI:IPI00201307.1	111	13549.9	ubiquinol-cytochrome c reductase binding protein	13.51	1													5.79651	13.51	1
IPI:IPI00193854.4	104	11992	Pterin-4-alpha-carbinolamine dehydratase	13.46	2													4.25475	13.46	2
IPI:IPI00947795.1	120	13567.7	14 kDa protein	13.33	1	1.83751	13.33	1
IPI:IPI00559098.3	145	16075.6	40S ribosomal protein S19	13.1	2													6.09086	13.1	2
IPI:IPI00231683.1	543	58756.7	Isoform L-type of Pyruvate kinase isozymes R/L	13.08	6	17.1621	13.08	6
IPI:IPI00211593.1	222	24658.6	Superoxide dismutase [Mn], mitochondrial	13.06	2													5.55449	13.06	2
IPI:IPI00359978.3	69	7836.2	40S ribosomal protein S28	13.04	1													1.83773	13.04	1
IPI:IPI00421885.3	453	49669.7	Acyl-coenzyme A thioesterase 2, mitochondrial	13.02	8	11.78	10.38	4	5.77095	2.65	2	6.64614	4.86	2	1.72615	0
IPI:IPI00332042.9	501	54424	Retinal dehydrogenase 1	12.97	7	7.38679	4.99	2	3.43302	3.39	1	10.2693	7.98	4
IPI:IPI00760137.1	357	38209.8	Sorbitol dehydrogenase	12.89	5	10.9903	12.89	4							2.41645	3.08	1
IPI:IPI00205374.1	325	34169.7	Hydroxymethylglutaryl-CoA lyase, mitochondrial	12.62	4										9.10243	12.62	4
IPI:IPI00948124.1	302	34881.9	35 kDa protein	12.58	4	1.61845	0								11.3421	12.58	4
IPI:IPI00326195.4	303	32412.6	Peroxisomal trans-2-enoyl-CoA reductase	12.54	4	4.23555	3.3	1							8.48698	12.54	3
IPI:IPI00202238.1	176	20845.4	NADH dehydrogenase (ubiquinone) 1 beta subcomplex, 10	12.5	2													4.03993	12.5	2
IPI:IPI00951390.1	201	22766.4	23 kDa protein	12.44	2										4.56428	12.44	2
IPI:IPI00231368.5	105	11665.7	Thioredoxin	12.38	1													2.42128	12.38	1
IPI:IPI00763872.1	216	23945.6	RCG20683, isoform CRA_b	12.04	3	7.46905	12.04	3
IPI:IPI00231148.8	349	37428.2	Glycerol-3-phosphate dehydrogenase [NAD+], cytoplasmic	12.03	6	19.429	6.88	2	2.10845	2.87	1				6.41118	8.02	3
IPI:IPI00193151.1	241	25535.9	Dihydropteridine reductase	12.03	2										0	0		5.16785	12.03	2
IPI:IPI00211510.1	661	74631.3	Isoform 1 of Peroxisomal acyl-coenzyme A oxidase 1	11.95	8	12.8811	8.17	4	3.01933	2.27	1	5.97818	4.24	2				3.44295	1.82	1
IPI:IPI00231107.5	102	11552.2	Parathymosin	11.76	1													2.56656	11.76	1
IPI:IPI00195123.1	213	23382.8	ATP synthase subunit O, mitochondrial	11.74	2													6.25386	11.74	2
IPI:IPI00780297.1	179	19563.4	20 kDa protein	11.73	4	5.5467	11.73	2							4.71072	11.73	2
IPI:IPI00194324.2	359	38957	Pyruvate dehydrogenase E1 component subunit beta, mitochondrial	11.7	4										8.26469	11.7	4
IPI:IPI00776760.1	112	12662.5	13 kDa protein	11.61	1													2.3207	11.61	1
IPI:IPI00230788.6	260	29412.7	Carbonic anhydrase 3	11.54	5	4.65669	3.46	1				1.60038	0		3.96526	8.08	2	3.7923	8.08	2
IPI:IPI00231069.5	87	10021.2	Acyl-CoA-binding protein	11.49	1													4.92326	11.49	1
IPI:IPI00200041.4	288	31667.1	Phenazine biosynthesis-like domain-containing protein	11.46	2										4.5254	11.46	2
IPI:IPI00325765.2	367	40649.3	Aflatoxin B1 aldehyde reductase member 2	11.44	3										9.55966	11.44	3
IPI:IPI00362395.5	282	31343.4	S-formylglutathione hydrolase	11.35	2										4.96385	11.35	2
IPI:IPI00201436.1	397	43670.1	S-adenosylmethionine synthetase isoform type-1	11.34	5	13.054	11.34	3				5.2799	7.56	2
IPI:IPI00559336.3	212	23521.6	similar to prohibitin	11.32	2										6.47645	11.32	2
IPI:IPI00188804.1	115	11684.9	60S acidic ribosomal protein P2	11.3	1													2.59771	11.3	1
IPI:IPI00200659.1	656	71569.7	Succinate dehydrogenase [ubiquinone] flavoprotein subunit, mitochondrial	11.28	6				17.2799	11.28	6
IPI:IPI00192572.1	338	38563.5	Phytanoyl-CoA dioxygenase, peroxisomal	11.24	4				2.68823	4.73	1				7.3973	11.24	3
IPI:IPI00231260.5	224	24803	Peroxiredoxin-6	11.16	2													4.16007	11.16	2
IPI:IPI00230859.5	325	36482.9	Alcohol dehydrogenase [NADP+]	11.08	3										7.85805	11.08	3
IPI:IPI00781565.1	136	15378.5	histone cluster 2, H3c2	11.03	3	2.18767	6.62	1										8.60944	11.03	2
IPI:IPI00192301.2	201	22244.4	Glutathione peroxidase 1	10.95	3										1.86406	5.47	1	4.06082	10.95	2
IPI:IPI00215107.3	295	32803.4	40S ribosomal protein SA	10.85	5							3.8646	7.8	2	7.43602	10.85	3
IPI:IPI00208917.4	539	58711.4	similar to aldehyde dehydrogenase family 7, member A1	10.76	10	7.14638	5.75	2	10.143	6.49	3	20.7626	9.46	5
IPI:IPI00870631.2	289	32281	Purine nucleoside phosphorylase	10.73	4	6.21142	6.92	2							4.94321	7.27	2
IPI:IPI00214052.1	245	27885	Carboxymethylenebutenolidase homolog	10.61	2													4.15842	10.61	2
IPI:IPI00950839.1	464	49657	50 kDa protein	10.56	15	8.27592	4.96	2	4.03118	4.09	2	14.4134	10.56	5	6.58687	6.03	3	7.15011	6.9	3
IPI:IPI00231864.5	105	11598	Cytochrome c, somatic	10.48	1													1.9314	10.48	1
IPI:IPI00949097.1	287	30369.7	aspartate dehydrogenase	10.45	2										6.16651	10.45	2
IPI:IPI00196808.1	127	15012.3	similar to 60S ribosomal protein L32	10.24	1													2.28323	10.24	1
IPI:IPI00324380.3	147	15709.9	Transthyretin	10.2	1													3.08744	10.2	1
IPI:IPI00564133.1	454	51011.3	Kynurenine--oxoglutarate transaminase 3	10.13	7	4.24529	4.63	2				9.93357	8.15	4	1.8642	2.64	1
IPI:IPI00359623.4	487	53426.3	similar to aldehyde dehydrogenase 8 family, member A1 isoform 2	10.06	5	4.6096	3.08	1	5.36544	6.57	2	9.4775	6.57	2
IPI:IPI00358033.1	727	79361.6	NADH-ubiquinone oxidoreductase 75 kDa subunit, mitochondrial	10.04	6	1.62245	0		21.3105	10.04	6
IPI:IPI00421832.1	110	11276.8	Dermcidin	10	3	1.77783	0					1.84572	10	1	1.76998	10	1	1.85451	10	1
IPI:IPI00208970.1	393	44014	Beta-ureidopropionase	9.92	6				3.9177	4.58	1	6.05944	7.63	2	8.82609	6.87	3
IPI:IPI00471539.4	434	46958.8	RCG56440	9.91	4				2.42366	3.23	1	12.3691	9.91	3
IPI:IPI00782505.1	111	12079.8	12 kDa protein	9.91	1							2.22508	9.91	1
IPI:IPI00561918.2	308	34410	34 kDa protein	9.74	7	2.97835	5.19	1	2.01701	5.19	1	4.73093	9.74	2	8.29924	5.19	3
IPI:IPI00371236.3	452	49491	Elongation factor Tu, mitochondrial	9.73	4	2.21486	3.54	1				6.55265	6.19	3	1.63908	0
IPI:IPI00230835.5	247	28284.9	14-3-3 protein gamma	9.72	2										6.67726	9.72	2
IPI:IPI00189016.4	103	12566.6	13 kDa protein	9.71	1	0	0		1.92763	9.71	1	1.68212	0		0	0
IPI:IPI00188858.4	382	41801.5	Alpha-methylacyl-CoA racemase	9.69	4	5.13892	2.36	1							6.77026	9.69	3
IPI:IPI00782169.1	636	68907.7	69 kDa protein	9.59	7	7.22201	4.09	2	10.3299	7.86	4	2.84886	2.36	1
IPI:IPI00777547.2	180	20667.3	21 kDa protein	9.44	2													4.51863	9.44	2
IPI:IPI00382153.4	576	61787.7	Keratin, type II cytoskeletal 5	9.38	24	9.62287	5.9	3	13.8038	5.56	5	9.70633	5.56	4	16.9354	3.47	6	15.6559	7.29	6
IPI:IPI00948751.1	503	54947.1	55 kDa protein	9.34	4				1.74623	1.99	1	7.3841	7.36	3
IPI:IPI00555168.2	182	21113.3	Ferritin heavy chain	9.34	2													3.60477	9.34	2
IPI:IPI00193485.2	452	50934.9	Isocitrate dehydrogenase [NADP], mitochondrial	9.29	7	1.78435	0		4.1254	4.87	2	11.6685	9.29	4	1.75243	1.99	1
IPI:IPI00212015.1	421	46525.8	Medium-chain specific acyl-CoA dehydrogenase, mitochondrial	9.26	8	4.70596	6.41	2	2.52942	3.56	1	4.86976	3.56	2	7.58365	9.26	3
IPI:IPI00475776.1	119	13364.3	40S ribosomal protein S20	9.24	2													7.6062	9.24	2
IPI:IPI00365545.1	509	54004.1	Dihydrolipoyl dehydrogenase, mitochondrial	9.04	5	5.4857	2.75	1	1.92052	2.75	1	7.38296	6.29	3
IPI:IPI00325135.3	255	29155.4	14-3-3 protein epsilon	9.02	2										5.8032	9.02	2
IPI:IPI00780927.2	248	27727.8	splicing factor, arginine/serine-rich 1	8.87	2										3.99866	8.87	2
IPI:IPI00655249.1	300	32364.9	Enoyl-CoA hydratase domain-containing protein 3, mitochondrial	8.67	2				0	0		0	0		6.69213	8.67	2
IPI:IPI00188924.4	452	48366.2	Cytochrome b-c1 complex subunit 2, mitochondrial	8.63	5							8.12079	8.63	3	7.05734	6.19	2
IPI:IPI00205561.1	681	76749.9	Peroxisomal acyl-coenzyme A oxidase 2	8.52	4	12.3499	8.52	4
IPI:IPI00360618.3	296	33964.1	RGD1564894 protein	8.45	2										4.91622	8.45	2
IPI:IPI00561647.6	735	79378	Peroxisomal multifunctional enzyme type 2	8.44	9	12.2336	7.21	4	5.84486	3.4	2				9.72451	4.63	3
IPI:IPI00200661.1	2505	272478	Fatty acid synthase	8.42	19	56.8852	8.42	19
IPI:IPI00230889.5	155	17460.2	Microsomal glutathione S-transferase 1	8.39	1	3.0358	8.39	1
IPI:IPI00208707.2	121	13602.1	similar to ribosomal protein S12	8.26	1													1.95624	8.26	1
IPI:IPI00566850.3	281	30438.4	30 kDa protein	8.19	2										4.4433	8.19	2
IPI:IPI00421857.1	625	64791.1	Keratin, type II cytoskeletal 1	8.16	21	6.30924	3.68	2	8.36331	5.28	3	15.4814	8.16	6	15.671	8.16	6	12.9249	5.28	4
IPI:IPI00212767.1	246	25942.7	Anionic trypsin-1	8.13	8	8.66262	8.13	2	9.50915	8.13	2	8.59529	8.13	2	9.00346	8.13	2
IPI:IPI00515768.1	296	33877	Glycine N-acyltransferase	8.11	2										6.36744	8.11	2
IPI:IPI00475634.1	247	28691.8	Isoform 3 of Tropomyosin alpha-3 chain	8.1	2										4.12259	8.1	2
IPI:IPI00197555.6	346	36125	Succinyl-CoA ligase [GDP-forming] subunit alpha, mitochondrial	8.09	2										7.1976	8.09	2
IPI:IPI00369217.1	706	80410.8	Heat shock protein 75 kDa, mitochondrial	8.07	6	3.21673	1.98	1	9.83843	8.07	4	2.78982	1.98	1
IPI:IPI00817078.1	174	19524	Proteasome subunit alpha type	8.05	1										1.90768	8.05	1
IPI:IPI00914178.1	313	34559.1	Fumarylacetoacetate hydrolase domain-containing protein 2	7.99	2										5.34405	7.99	2
IPI:IPI00470325.1	581	62839.4	Pyridine nucleotide-disulfide oxidoreductase domain-containing protein 2	7.92	6				4.18168	3.96	2	8.92786	7.92	4
IPI:IPI00210264.3	241	27651	Glutathione S-transferase omega-1	7.88	2										4.39112	7.88	2
IPI:IPI00196994.1	204	23392.8	Rho GDP-dissociation inhibitor 1	7.84	3	2.24443	7.84	1							3.39833	7.84	1	3.45157	7.84	1
IPI:IPI00391380.3	245	28143.2	28 kDa protein	7.76	2													4.61903	7.76	2
IPI:IPI00760139.1	143	15287.9	Isoform SCP2 of Non-specific lipid-transfer protein	7.69	1							2.02092	7.69	1	1.7032	0		1.68587	0
IPI:IPI00214152.1	260	28877.8	Isoform 2 of Hydroxyacylglutathione hydrolase, mitochondrial	7.69	2										4.60567	7.69	2
IPI:IPI00361429.3	117	13363.3	similar to ribosomal protein L31	7.69	1													2.42308	7.69	1
IPI:IPI00370090.1	447	48840.1	Keratin, type I cytoskeletal 15	7.61	11	5.49876	1.57	2	1.52592	1.57	1	9.3836	5.59	3	5.33654	4.03	2	6.24405	3.58	3
IPI:IPI00766238.3	425	48086.6	UPF0465 protein C5orf33 homolog	7.53	3							6.20333	7.53	3
IPI:IPI00213463.2	911	104849	Alpha-actinin-4	7.46	7	4.30909	2.41	2	14.7729	6.37	5
IPI:IPI00191728.1	416	47965.8	Calreticulin	7.45	4				1.95181	3.13	1	11.0047	7.45	3
IPI:IPI00212523.1	189	19961.4	Protein DJ-1	7.41	1													1.85382	7.41	1
IPI:IPI00358163.3	676	74351.8	similar to Calcium-binding mitochondrial carrier protein Aralar2	7.4	4	11.5686	7.4	4
IPI:IPI00191354.2	284	33128.8	33 kDa protein	7.39	2										4.05319	7.39	2
IPI:IPI00559637.1	142	0	Protein	7.04	1													3.21802	7.04	1
IPI:IPI00211392.1	541	58876.5	Formimidoyltransferase-cyclodeaminase	7.02	6	5.00044	4.81	2				9.98675	7.02	4
IPI:IPI00327335.3	299	34812.8	Sulfotransferase family cytosolic 1B member 1	7.02	2							1.70301	0		5.90342	7.02	2
IPI:IPI00211507.3	393	45083.9	4-hydroxyphenylpyruvate dioxygenase	6.87	5	5.42025	2.29	1				4.15994	4.58	2	4.30143	4.58	2
IPI:IPI00760118.1	262	28712.9	Isoform 11-HSD1B of Corticosteroid 11-beta-dehydrogenase isozyme 1	6.87	2	4.53824	6.87	2
IPI:IPI00192246.1	146	16119.3	Cytochrome c oxidase subunit 5A, mitochondrial	6.85	2													7.31477	6.85	2
IPI:IPI00324443.1	504	57138.5	Cytochrome P450 2D1	6.75	2	10.2443	6.75	2
IPI:IPI00190179.3	850	97421	Glycogen phosphorylase, liver form	6.71	9	14.5977	4.35	3	16.9795	6.71	6
IPI:IPI00364134.1	284	33325	4-nitrophenylphosphatase domain and non-neuronal SNAP25-like protein homolog 1	6.69	4										3.50925	6.69	2	5.049	6.69	2
IPI:IPI00388707.4	676	74639.5	similar to urocanase domain containing 1	6.66	4	8.33052	6.66	4
IPI:IPI00214456.2	361	40108.3	Adenosine kinase	6.65	2	4.72251	6.65	2
IPI:IPI00200794.1	244	25703.4	L-xylulose reductase	6.56	1													2.86574	6.56	1
IPI:IPI00764225.2	202	21977.9	Rae-like protein (Fragment)	6.44	2	1.81009	6.44	1	1.90704	6.44	1
IPI:IPI00421625.6	172	19825.6	Myosin regulatory light chain 12B	6.4	1													2.70211	6.4	1
IPI:IPI00551702.2	454	48894.4	Dihydrolipoyllysine-residue succinyltransferase component of 2-oxoglutarate dehydrogenase complex, mitochondrial	6.39	5	3.48601	2.42	1	3.25487	3.74	2	8.11428	5.07	2
IPI:IPI00948299.1	141	15879.1	16 kDa protein	6.38	1				1.96694	6.38	1
IPI:IPI00911258.1	141	16000	hypothetical protein LOC293613	6.38	1													1.82316	6.38	1
IPI:IPI00201399.1	330	36008.4	Delta-aminolevulinic acid dehydratase	6.36	2										6.23339	6.36	2
IPI:IPI00369195.3	330	37818	pyrophosphatase (inorganic) 2	6.36	2										4.65125	6.36	2
IPI:IPI00947772.1	425	47600.8	48 kDa protein	6.35	2	4.95384	6.35	2
IPI:IPI00324019.1	411	46106.5	Alpha-1-antiproteinase	6.33	2				1.64697	0		7.91399	6.33	2	1.69966	0
IPI:IPI00373660.2	159	18463.9	similar to 60S ribosomal protein L17	6.29	1													1.82985	6.29	1
IPI:IPI00370073.1	433	48093.1	Keratin, type I cytoskeletal 17	6.24	9	5.49876	1.62	2	1.52592	1.62	1	5.33002	1.62	1	3.38229	2.08	1	8.89157	6.24	4
IPI:IPI00193918.1	129	13905.9	Cytochrome c oxidase subunit 5B, mitochondrial	6.2	1													1.97905	6.2	1
IPI:IPI00562127.1	262	29179.8	ribosomal protein S4, Y-linked 2	6.11	2										4.8169	6.11	2	0	0
IPI:IPI00325599.4	461	51517.3	Argininosuccinate lyase	6.07	2	0	0					6.86977	6.07	2
IPI:IPI00230901.7	496	55073.9	Alanine aminotransferase 1	6.05	2							5.21629	6.05	2
IPI:IPI00781904.2	351	0	similar to Nonsyndromic hearing impairment protein 5 homolog	5.98	1	2.40708	5.98	1
IPI:IPI00560533.3	218	24461.5	Hypoxanthine-guanine phosphoribosyltransferase	5.96	1													1.76719	5.96	1
IPI:IPI00362963.1	303	33665.1	Similar to RIKEN cDNA 1810022C23	5.94	2	1.76389	0								4.11189	5.94	2
IPI:IPI00566237.1	304	33909.7	34 kDa protein	5.92	1										2.39327	5.92	1
IPI:IPI00191707.4	390	43198.6	Pyruvate dehydrogenase E1 component subunit alpha, somatic form, mitochondrial	5.9	5				4.28598	3.33	1	5.00323	5.9	2	4.46192	5.9	2
IPI:IPI00471577.1	480	52815.4	Cytochrome b-c1 complex subunit 1, mitochondrial	5.83	4				2.03397	0		16.6561	5.83	4
IPI:IPI00206977.1	466	51833.5	Citrate synthase, mitochondrial	5.79	2							4.102	5.79	2
IPI:IPI00950667.1	226	23804.4	24 kDa protein	5.75	1										1.74945	5.75	1
IPI:IPI00780167.2	1481	164604	165 kDa protein	5.74	8	16.0817	5.74	7	2.65678	0.54	1
IPI:IPI00948868.1	436	48044.6	48 kDa protein	5.73	2	4.57236	5.73	2
IPI:IPI00324047.3	230	24692.3	Acyl-protein thioesterase 1	5.65	1													2.41608	5.65	1
IPI:IPI00192072.3	252	28356.1	hypothetical protein LOC307926	5.56	1	0	0		2.11618	0					2.30646	5.56	1	0	0
IPI:IPI00950965.1	180	19533.4	Adenine phosphoribosyltransferase	5.56	1													3.02162	5.56	1
IPI:IPI00203522.2	456	49942.1	Ribonuclease inhibitor	5.48	2							1.81494	3.29	1	1.75946	2.19	1
IPI:IPI00208348.1	312	34885.6	Pyridoxal kinase	5.45	1										2.15998	5.45	1
IPI:IPI00359730.3	149	17195.1	similar to ribosomal protein L27	5.37	1							1.85387	5.37	1
IPI:IPI00360930.2	261	28282.2	Carbonic anhydrase 1	5.36	1										2.24663	5.36	1
IPI:IPI00231693.5	264	29925.7	40S ribosomal protein S3a	5.3	1										2.26462	5.3	1
IPI:IPI00230944.2	437	49620	Isoform Gamma-A of Fibrinogen gamma chain	5.26	2							5.62555	5.26	2
IPI:IPI00327745.1	228	26159.1	Serum amyloid P-component	5.26	1													2.76272	5.26	1
IPI:IPI00951310.1	191	20778.8	21 kDa protein	5.24	1	2.87987	5.24	1										1.72032	0
IPI:IPI00951631.1	231	25050.1	25 kDa protein	5.19	1													2.42271	5.19	1
IPI:IPI00201262.1	1477	163670	Alpha-1-inhibitor 3	5.15	7	13.8525	5.15	6	2.65678	0.54	1
IPI:IPI00870114.1	447	49681.5	glutaryl-Coenzyme A dehydrogenase	5.15	2	3.0705	3.8	1				1.88786	1.34	1
IPI:IPI00361470.3	375	42880.8	RGD1306462 protein	5.07	1	2.01155	0		2.47305	5.07	1
IPI:IPI00767591.1	335	35914.8	RCG54768, isoform CRA_a	5.07	2										4.81634	5.07	2
IPI:IPI00370337.1	242	28178.8	28S ribosomal protein S7, mitochondrial	4.96	1	2.11758	4.96	1
IPI:IPI00364917.3	323	36876.8	similar to Aldo-keto reductase family 1 member C13	4.95	3	1.88288	2.48	1							4.04041	4.95	2
IPI:IPI00829505.1	488	52725.8	Isoform 2 of Cytosol aminopeptidase	4.92	3				2.82581	2.46	1	8.50423	4.92	2
IPI:IPI00189655.3	388	42840.5	Oxytocin receptor	4.9	1	2.03974	0		2.06871	0					2.02698	4.9	1	0	0
IPI:IPI00324893.4	245	27753.7	14-3-3 protein zeta/delta	4.9	1										4.13096	4.9	1
IPI:IPI00328013.4	327	36723.3	Aflatoxin B1 aldehyde reductase member 3	4.89	1										2.33589	4.89	1
IPI:IPI00325147.1	353	40803.9	Farnesyl pyrophosphate synthetase	4.82	2	3.90759	4.82	2
IPI:IPI00192078.2	291	32802.1	Biphenyl hydrolase-like	4.81	2										0	0		6.89992	4.81	2
IPI:IPI00196107.1	256	28850.5	ATP synthase subunit b, mitochondrial	4.69	1	1.83696	4.69	1
IPI:IPI00951690.1	256	28452.5	28 kDa protein	4.69	1										2.12509	4.69	1
IPI:IPI00189415.1	278	31825.5	Alpha-tocopherol transfer protein	4.68	1										2.35137	4.68	1
IPI:IPI00760152.1	278	31571.3	Isoform 3 of NADH-cytochrome b5 reductase 3	4.68	1										2.58676	4.68	1
IPI:IPI00212220.2	643	72674.7	Protein disulfide-isomerase A4	4.67	4	2.112	1.71	1	6.41887	4.67	3
IPI:IPI00197900.5	257	28748.5	Translation elongation factor 1-delta subunit	4.67	1										2.05548	4.67	1
IPI:IPI00207933.2	279	29802.8	peroxisomal short-chain alcohol dehydrogenase	4.66	1	2.85551	4.66	1
IPI:IPI00196457.1	304	35740.7	Sulfotransferase 1C1	4.61	2										4.93585	4.61	2
IPI:IPI00191748.3	263	29498.8	Proteasome subunit alpha type-1	4.56	1										1.90447	4.56	1
IPI:IPI00324020.6	373	42240.3	Glutamine synthetase	4.56	1										2.8391	4.56	1
IPI:IPI00231264.6	355	39471.2	Serum paraoxonase/arylesterase 1	4.51	1	4.63332	4.51	1
IPI:IPI00557468.2	249	26503.9	27 kDa protein	4.42	1													2.04816	4.42	1
IPI:IPI00209908.1	227	25925.1	Cytochrome c oxidase subunit 2	4.41	2	1.9598	4.41	1							1.82419	4.41	1
IPI:IPI00952294.1	182	19411.9	19 kDa protein	4.4	1	1.8595	4.4	1
IPI:IPI00203317.1	504	57931.9	Cytochrome P450 4A2	4.37	2	4.27538	4.37	2
IPI:IPI00231506.5	253	28736.8	Phosphoglycerate mutase 2	4.35	1										1.70846	0		2.73898	4.35	1
IPI:IPI00948051.1	323	36231.2	36 kDa protein	4.33	1				1.76227	4.33	1
IPI:IPI00213584.4	513	57204.7	Alanine--glyoxylate aminotransferase 2, mitochondrial	4.29	3	2.18035	1.95	1				8.8175	4.29	2
IPI:IPI00781252.1	210	24025.2	24 kDa protein	4.29	1													2.11428	4.29	1
IPI:IPI00365663.1	446	50636.2	branched chain keto acid dehydrogenase E1, alpha polypeptide	4.26	2							6.239	4.26	2
IPI:IPI00785564.2	282	31808.9	Succinate dehydrogenase [ubiquinone] iron-sulfur subunit, mitochondrial	4.26	1													3.62512	4.26	1
IPI:IPI00454475.1	519	57219.6	Keratin, type II cytoskeletal 1b	4.24	15	5.51754	4.24	2	8.21671	4.24	3	7.86407	4.24	3	11.2615	4.24	4	9.97895	4.24	3
IPI:IPI00214373.1	425	47753.7	Kynurenine/alpha-aminoadipate aminotransferase, mitochondrial	4.24	2							5.56527	4.24	2
IPI:IPI00193845.1	260	30174.7	leukocyte receptor cluster (LRC) member 1	4.23	1	1.95917	4.23	1
IPI:IPI00560024.1	213	24043.9	24 kDa protein	4.23	1										2.22174	4.23	1
IPI:IPI00213644.3	216	23787.5	Peptidyl-prolyl cis-trans isomerase B	4.17	1													3.49638	4.17	1
IPI:IPI00191502.5	241	26374.2	Proteasome subunit alpha type-5	4.15	1													2.10246	4.15	1
IPI:IPI00188142.1	319	35396.7	Aspartoacylase-2	4.08	1										1.96789	4.08	1
IPI:IPI00191501.1	246	27381.8	Proteasome subunit alpha type-6	4.07	1													1.83039	4.07	1
IPI:IPI00193919.5	546	60767.9	Sulfite oxidase, mitochondrial	4.03	2				1.64473	0		7.74452	4.03	2
IPI:IPI00565708.2	347	38538.5	Isoform 1 of Haptoglobin	4.03	1										2.79198	4.03	1
IPI:IPI00203214.6	858	95222.9	Elongation factor 2	3.96	3				7.72605	3.96	3
IPI:IPI00568535.2	887	100134	100 kDa protein	3.95	3	6.75131	2.93	2	1.77619	1.01	1
IPI:IPI00371375.2	708	80882.7	81 kDa protein	3.95	2							2.01961	1.69	1	1.72285	0		2.10176	2.26	1
IPI:IPI00326606.4	357	39245.3	Isoform 2 of Protein NDRG2	3.92	1										1.73573	3.92	1
IPI:IPI00565002.2	154	16892.8	17 kDa protein	3.9	1													1.75721	3.9	1
IPI:IPI00357893.3	311	34503.1	Isoform 2 of 3-hydroxyisobutyryl-CoA hydrolase, mitochondrial	3.86	1										2.01346	3.86	1
IPI:IPI00209363.1	286	31434.1	Solute carrier family 25 (Mitochondrial carrier	3.85	1	4.16721	3.85	1
IPI:IPI00760135.1	392	43371.7	Isoform Peroxisomal of Serine--pyruvate aminotransferase, mitochondrial	3.83	1										1.82889	3.83	1
IPI:IPI00365929.1	445	48729.6	protein disulfide isomerase A6	3.82	2				2.43056	3.82	1	3.18151	3.82	1
IPI:IPI00231134.5	317	35054.6	Guanine nucleotide-binding protein subunit beta-2-like 1	3.79	1										2.22218	3.79	1
IPI:IPI00188330.1	212	23954.7	Ndufs8 protein	3.77	1													3.68521	3.77	1
IPI:IPI00193425.1	272	29567	Isoform 2 of Basigin	3.68	2	2.16898	3.68	1				2.00857	3.68	1
IPI:IPI00212316.1	896	99124.6	microsomal triglyceride transfer protein	3.68	3	7.18549	3.68	3				0	0
IPI:IPI00766273.1	220	22220.2	similar to Histone H1.2	3.64	2	1.74434	0		1.9128	3.64	1	1.83162	3.64	1
IPI:IPI00951461.1	498	54200.8	hypothetical protein LOC314800	3.61	1				2.81003	3.61	1
IPI:IPI00327626.1	530	60484.9	UDP-glucuronosyltransferase 2B3	3.58	2	4.34146	3.58	2
IPI:IPI00199273.1	368	41253.4	Hsc70-interacting protein	3.53	1							2.25927	3.53	1
IPI:IPI00556929.4	283	30778.4	Isoform 1 of Voltage-dependent anion-selective channel protein 3	3.53	1										2.01924	3.53	1
IPI:IPI00204104.1	284	32765.5	F-box only protein 6	3.52	1	1.84747	3.52	1
IPI:IPI00231194.5	285	31405.9	N(G),N(G)-dimethylarginine dimethylaminohydrolase 1	3.51	1										2.03908	3.51	1
IPI:IPI00391544.2	315	34970.4	Ester hydrolase C11orf54 homolog	3.49	1										1.81156	3.49	1
IPI:IPI00948254.1	317	34449.7	34 kDa protein	3.47	1										2.23126	3.47	1
IPI:IPI00390521.1	290	33150	GTPase, IMAP family member	3.45	1	1.82033	3.45	1
IPI:IPI00206703.1	206	23302.9	Ras-related protein Ral-B	3.4	1							2.06622	3.4	1
IPI:IPI00777437.2	266	29965.1	30 kDa protein	3.38	1				1.76193	3.38	1
IPI:IPI00562259.1	356	39419.4	Phosphate carrier protein, mitochondrial	3.37	1	2.30641	3.37	1				0	0
IPI:IPI00559533.2	685	69085.2	Keratin, type II cytoskeletal 2 epidermal	3.36	10	3.18374	2.04	1	2.35987	2.04	1	5.00148	3.21	2	8.71472	3.36	4	6.60004	3.36	2
IPI:IPI00188671.1	392	42349.5	Galactokinase 1	3.32	1										2.49572	3.32	1
IPI:IPI00949815.1	667	75112.1	75 kDa protein	3.3	2				4.90358	3.3	2
IPI:IPI00362949.1	274	29427.2	Cytochrome b-c1 complex subunit Rieske, mitochondrial	3.28	1													1.86414	3.28	1
IPI:IPI00362000.2	337	39281.7	Palmitoyltransferase ZDHHC15	3.26	1							1.96274	3.26	1
IPI:IPI00949972.1	312	36279.9	Protein synthesis initiation factor 4AII	3.21	1	3.56332	3.21	1
IPI:IPI00198966.3	444	50222.6	50 kDa protein	3.15	1							1.99412	3.15	1
IPI:IPI00421513.8	413	46399.5	Aspartate aminotransferase, cytoplasmic	3.15	1										3.26206	3.15	1
IPI:IPI00194059.1	417	46184.2	ARP10 actin-related protein 10 homolog	3.12	1				1.84606	3.12	1
IPI:IPI00206980.1	322	34953.5	Apomucin	3.11	1													1.9121	3.11	1
IPI:IPI00948515.1	293	32223.4	32 kDa protein	3.07	1	1.95514	3.07	1
IPI:IPI00561561.1	367	39310.8	39 kDa protein	3	1	1.63125	0								1.98475	3	1
IPI:IPI00948380.1	333	36474.2	Ig gamma-2B chain C region	3	1							4.12017	3	1
IPI:IPI00188135.4	236	26574.8	27 kDa protein	2.97	1										1.89653	2.97	1
IPI:IPI00212658.4	340	37307.1	Guanine nucleotide-binding protein G(I)/G(S)/G(T) subunit beta-2	2.94	1										2.09466	2.94	1
IPI:IPI00366169.3	686	74067.7	BRF1 homolog, subunit of RNA polymerase III transcription initiation factor IIIB	2.92	1				2.43137	2.92	1
IPI:IPI00200604.1	380	42793.6	Megsin	2.89	1													2.09844	2.89	1
IPI:IPI00205368.1	314	35060.2	olfactory receptor Olr8	2.87	1	1.74123	0		1.70762	0		1.95803	2.87	1	1.60851	0		0	0
IPI:IPI00231714.3	632	67123.4	Dihydrolipoyllysine-residue acetyltransferase component of pyruvate dehydrogenase complex, mitochondrial	2.85	1				5.25625	2.85	1
IPI:IPI00196167.1	318	36152.9	NADH-ubiquinone oxidoreductase chain 1	2.83	1							1.94165	2.83	1
IPI:IPI00365297.3	353	37963.4	Agmatinase, mitochondrial	2.83	1										2.21551	2.83	1
IPI:IPI00361228.2	354	40495.4	nodal homolog	2.82	2	1.85187	2.82	1	1.8273	2.82	1	1.7656	0		1.73332	0
IPI:IPI00231968.4	319	35871.1	Annexin A4	2.82	1				1.76151	2.82	1
IPI:IPI00911336.1	471	52728.2	Cysteine sulfinate decarboxylase	2.76	2	2.24007	2.76	1				2.02466	2.76	1
IPI:IPI00766784.1	877	96916.3	similar to aldehyde dehydrogenase 1 family, member L2	2.74	3	4.44481	1.25	1	6.38171	2.74	2
IPI:IPI00358872.2	403	44035.9	Aminomethyltransferase	2.73	1	0	0								2.07351	2.73	1
IPI:IPI00393205.2	403	44764.4	RUN domain-containing protein 3B	2.73	1	2.06951	2.73	1
IPI:IPI00421624.1	514	55763.8	Inosine-5'-monophosphate dehydrogenase	2.72	1	2.34683	0		2.4595	2.72	1
IPI:IPI00769270.1	527	60852.9	similar to zinc finger protein 397 isoform 1	2.66	2	2.34211	2.66	1	1.81144	2.66	1
IPI:IPI00765849.1	526	60200.3	similar to Nedd8 ultimate buster-1	2.66	1				2.45368	2.66	1
IPI:IPI00195803.1	493	54857.3	UDP-glucose 6-dehydrogenase	2.64	1							1.90788	2.64	1
IPI:IPI00475576.3	653	71132.8	71 kDa protein	2.6	1										2.10563	2.6	1
IPI:IPI00215321.1	387	44517.3	Gamma-butyrobetaine dioxygenase	2.58	1										1.90654	2.58	1
IPI:IPI00208784.5	428	47469.6	Isoform 1 of Flotillin-1	2.57	1										2.59809	2.57	1
IPI:IPI00563899.3	524	57468.1	58 kDa protein	2.48	1							1.9819	2.48	1
IPI:IPI00565837.1	285	32127.1	TAR DNA binding protein	2.46	1	1.68346	0					1.82998	2.46	1
IPI:IPI00373665.5	368	42166.5	42 kDa protein	2.45	1										1.75943	2.45	1	0	0
IPI:IPI00210357.1	415	45700.9	Heterogeneous nuclear ribonucleoprotein F	2.41	1										2.08722	2.41	1	1.6642	0
IPI:IPI00777916.1	290	33499.9	34 kDa protein	2.41	1										1.83379	2.41	1
IPI:IPI00367164.2	587	66965.4	Mitochondrial ribonuclease P protein 3	2.39	1				1.76893	2.39	1
IPI:IPI00808691.1	420	48153.3	hypothetical protein isoform 3	2.38	1							1.88224	2.38	1
IPI:IPI00758468.2	472	52008.6	Plasma glutamate carboxypeptidase	2.33	2				2.29666	2.33	1	2.254	2.33	1
IPI:IPI00203008.2	657	73010.7	Kinesin-like protein KIF22	2.28	1	2.53405	2.28	1
IPI:IPI00395267.1	622	69371	Phosphoenolpyruvate carboxykinase, cytosolic [GTP]	2.25	1				2.96834	2.25	1	1.63101	0
IPI:IPI00764587.1	622	69716.7	similar to mbt domain containing 1 isoform 1	2.25	1				1.79296	2.25	1
IPI:IPI00366218.3	535	57422.1	T-complex protein 1 subunit beta	2.24	1	1.69206	0					2.48932	2.24	1
IPI:IPI00360104.2	359	39264.6	similar to retinoblastoma-binding protein 1 isoform I	2.23	1	1.79178	2.23	1
IPI:IPI00373715.3	584	65399.7	similar to zinc finger protein 212	2.23	2	0	0					0	0		1.85157	2.23	1	1.80611	2.23	1
IPI:IPI00208422.2	767	88032.6	Dipeptidyl peptidase 4	2.22	1	2.85827	2.22	1
IPI:IPI00370526.2	495	53679	SMAD family member 6	2.22	1							2.34469	2.22	1
IPI:IPI00196283.1	503	56341.1	hedgehog acyltransferase-like	2.19	1							2.59413	2.19	1
IPI:IPI00195109.3	504	55729.6	Serine hydroxymethyltransferase	2.18	1				1.93929	2.18	1	1.69639	0
IPI:IPI00326135.1	608	66078.5	Apoptosis-inducing factor	2.14	2	2.95026	2.14	1	3.64438	2.14	1
IPI:IPI00231641.5	562	61364.6	Phosphoglucomutase-1	2.14	1				1.64668	0		2.52503	2.14	1
IPI:IPI00568787.2	374	39550.2	Alcohol dehydrogenase class-3	2.14	1										1.80999	2.14	1
IPI:IPI00326972.6	565	62107.7	Carboxylesterase 3	2.12	1	4.11611	2.12	1
IPI:IPI00205906.2	519	56778.7	Dihydropyrimidinase	2.12	1				1.74588	2.12	1	1.58729	0
IPI:IPI00569896.2	287	32407.9	32 kDa protein	2.09	1										1.71891	0		1.83123	2.09	1
IPI:IPI00193153.1	581	63575.2	2-hydroxyacyl-CoA lyase 1	2.07	1	2.04591	2.07	1	0	0
IPI:IPI00189549.2	686	78888	Lrrc49 protein	2.04	1	1.84342	2.04	1
IPI:IPI00650109.3	606	68019.3	Isoform 5 of Disks large homolog 2	1.98	1				1.87353	1.98	1
IPI:IPI00767277.1	606	65950.5	similar to NonO/p54nrb homolog	1.98	1							1.82143	1.98	1
IPI:IPI00851130.1	454	50868.7	Guanine deaminase	1.98	1							2.5712	1.98	1
IPI:IPI00195203.1	460	52455.3	Orexin receptor type 2	1.96	1				1.75151	1.96	1	0	0
IPI:IPI00949858.1	459	51766.3	52 kDa protein	1.96	1													2.26424	1.96	1
IPI:IPI00464718.1	615	69195.8	Ddx5	1.95	1							2.55764	1.95	1
IPI:IPI00766037.2	523	55153	Glycerate kinase	1.91	1							3.77372	1.91	1
IPI:IPI00212583.1	474	55536.9	Putative alpha-1,2-glucosyltransferase ALG10-B	1.9	1	1.78997	0		1.8581	1.9	1	1.67887	0
IPI:IPI00370815.4	548	59550.5	chaperonin containing Tcp1, subunit 8	1.82	1	1.72626	0					2.0061	1.82	1
IPI:IPI00858382.1	495	54663.8	LOC681126 protein	1.82	1													2.17776	1.82	1
IPI:IPI00327781.1	500	57144.4	Cytochrome P450 2C11	1.8	2	3.86689	1.8	2
IPI:IPI00204774.1	561	62454.7	Liver carboxylesterase B-1	1.78	1	1.87889	1.78	1
IPI:IPI00372282.3	1065	120890	RAB GTPase activating protein 1	1.78	1	0	0		2.79853	1.78	1
IPI:IPI00421798.3	453	51149.6	51 kDa protein	1.77	1	3.50481	0		1.68428	0		1.7141	0		1.85783	1.77	1	0	0
IPI:IPI00193481.3	625	67902.6	68 kDa protein	1.76	1							2.17907	1.76	1
IPI:IPI00851136.1	690	77516.7	Guanylate cyclase soluble subunit alpha-3	1.74	1				1.767	1.74	1
IPI:IPI00565501.2	587	63824	64 kDa protein	1.7	1										1.89797	1.7	1
IPI:IPI00764275.1	773	83941.2	similar to anillin	1.68	2							1.94637	1.68	1	1.7469	1.68	1
IPI:IPI00389753.1	937	104486	Isoform 1 of AP-2 complex subunit beta	1.6	1				3.7516	1.6	1
IPI:IPI00782229.2	625	69487.7	70 kDa protein	1.6	1				3.44429	1.6	1
IPI:IPI00363180.4	702	80367.5	similar to glucan (1,4-alpha-), branching enzyme 1	1.57	1	2.52184	1.57	1	2.14947	0
IPI:IPI00560217.3	702	0	FCH and double SH3 domains 2	1.57	1													1.96883	1.57	1
IPI:IPI00566233.3	512	55018.7	55 kDa protein	1.56	1													1.93914	1.56	1
IPI:IPI00768565.1	837	97018	helicase, lymphoid specific	1.55	1	1.89829	1.55	1
IPI:IPI00196404.1	386	42679.5	Urotensin II receptor	1.55	1				1.96397	1.55	1
IPI:IPI00554286.4	453	53159.7	hypothetical protein	1.55	1				1.81244	1.55	1	1.67413	0
IPI:IPI00764168.1	515	57455.1	RCG62590	1.55	2										1.79112	1.55	1	2.03208	1.55	1
IPI:IPI00557975.1	779	87315.6	Acyl-CoA dehydrogenase family member 11	1.54	2	2.68216	1.54	1	2.85858	1.54	1
IPI:IPI00388209.2	525	59181.1	Protein kinase C substrate 80K-H (Predicted), isoform CRA_b	1.52	1				4.18963	1.52	1
IPI:IPI00561940.3	594	66144.9	hypothetical protein	1.52	1										1.77765	1.52	1
IPI:IPI00207012.1	401	44681.1	Voltage-gated potassium channel subunit beta-1	1.5	2	1.77385	0					1.85983	1.5	1	1.90621	1.5	1	0	0
IPI:IPI00201060.4	665	74278.8	Lamin-A	1.5	1							4.35044	1.5	1
IPI:IPI00363040.4	872	101547	similar to IQ motif containing with AAA domain	1.49	1							1.80493	1.49	1
IPI:IPI00361540.1	683	76842	progressive external ophthalmoplegia 1	1.46	1				1.7467	1.46	1
IPI:IPI00199013.8	758	84074.2	Isoform 1 of Oxidation resistance protein 1	1.45	1				0	0		0	0		1.67783	0		1.77133	1.45	1
IPI:IPI00202395.1	979	109167	SLIT and NTRK-like family, member 3	1.43	1	1.80708	1.43	1				0	0
IPI:IPI00210234.5	630	70635.1	Plastin-3	1.43	3	0	0					6.62102	1.43	3
IPI:IPI00368347.2	1058	117713	Ubiquitin-like modifier-activating enzyme 1	1.42	1				2.30432	1.42	1
IPI:IPI00951420.1	703	80177.5	80 kDa protein	1.42	2				4.21699	1.42	2
IPI:IPI00882522.2	851	95704.6	96 kDa protein	1.41	1				1.78246	1.41	1
IPI:IPI00202494.3	1574	181836	similar to sterile alpha motif domain containing 9-like	1.4	2	1.89593	0.89	1							1.73966	0.51	1
IPI:IPI00205559.4	646	70410.5	cartilage acidic protein 1	1.39	2	1.81314	1.39	1	1.6781	0					1.94402	1.39	1
IPI:IPI00195620.4	1076	121521	Uncharacterized protein KIAA1688 homolog	1.39	1				1.76941	1.39	1
IPI:IPI00767030.1	574	65819.2	similar to preferentially expressed antigen in melanoma-like 3	1.39	1				1.97029	1.39	1
IPI:IPI00212314.5	577	67696.8	Moesin	1.39	1										1.87043	1.39	1
IPI:IPI00389048.2	659	74198.6	hypothetical protein	1.37	1	1.76157	0		1.83497	1.37	1	1.68311	0
IPI:IPI00763449.1	876	97393.7	similar to RP11-506B15.1 protein isoform 1	1.37	1										1.91573	1.37	1
IPI:IPI00949696.1	518	58222.1	ribosomal protein S6 kinase, polypeptide 5	1.35	1	1.90006	1.35	1	0	0								0	0
IPI:IPI00193650.4	519	57198.5	Isoform 3 of G-protein-signaling modulator 1	1.35	1				1.99023	1.35	1	1.79353	0
IPI:IPI00781133.1	897	98894.8	99 kDa protein	1.34	1				4.5759	1.34	1
IPI:IPI00200676.3	750	83098.1	Nibrin	1.33	1	1.80656	1.33	1
IPI:IPI00764128.3	831	92281.7	similar to F33H2.2	1.32	1	1.85777	1.32	1
IPI:IPI00192076.3	926	100174	100 kDa protein	1.3	1	0	0		2.2992	1.3	1
IPI:IPI00211516.3	616	67062.8	similar to Neurogenin 2	1.3	1							1.86755	1.3	1
IPI:IPI00763258.2	784	91942.5	92 kDa protein	1.28	1				2.12762	0					2.03035	1.28	1	0	0
IPI:IPI00373646.3	479	52601	53 kDa protein	1.25	1													1.77967	1.25	1
IPI:IPI00766690.1	1049	118768	FERM, RhoGEF (Arhgef) and pleckstrin domain protein 1	1.24	1										1.79918	1.24	1
IPI:IPI00193008.4	815	92295	RNA-binding protein 5	1.23	1										2.30266	1.23	1
IPI:IPI00911371.2	1069	119193	RGD1310159 protein	1.22	1							2.49253	1.22	1				1.74469	0
IPI:IPI00559296.2	737	81885.8	ATP-binding cassette, sub-family D (ALD), member 1	1.22	1										1.78022	1.22	1	0	0
IPI:IPI00337171.5	579	65208.1	65 kDa protein	1.21	1	1.64587	0		1.95279	1.21	1	1.77904	0
IPI:IPI00655312.2	993	113142	Isoform 2 of Myosin phosphatase Rho-interacting protein	1.21	1	1.65831	0					0	0		1.86108	1.21	1	1.69633	0
IPI:IPI00923707.1	825	93631.7	Isoform 2 of Ubiquitin carboxyl-terminal hydrolase 16	1.21	1										2.20574	1.21	1
IPI:IPI00370682.3	1196	133042	similar to diacylglycerol kinase, delta 130kDa isoform 1	1.17	1	1.50415	0		1.7804	1.17	1
IPI:IPI00367111.4	775	83719.4	similar to family with sequence similarity 48, member A isoform a	1.16	1	3.41774	1.16	1
IPI:IPI00358140.4	621	71724.5	DnaJ homolog subfamily C member 2	1.13	1				1.75754	1.13	1
IPI:IPI00870580.1	1006	110048	mindbomb homolog 1	1.09	1	3.13521	1.09	1
IPI:IPI00325618.1	725	79099.8	Antigen peptide transporter 1	0.97	1										1.76126	0.97	1
IPI:IPI00193662.3	727	83881.6	engulfment and cell motility 1	0.96	2	1.63928	0		0	0		1.80466	0.96	1	1.78579	0.96	1	0	0
IPI:IPI00471776.4	1771	169480	similar to mucin 19	0.96	1							1.98513	0.96	1
IPI:IPI00368156.5	1164	131659	mannosidase 2, alpha 2	0.95	1	1.81223	0.95	1
IPI:IPI00768253.3	1175	126089	126 kDa protein	0.94	1				1.75753	0.94	1
IPI:IPI00188524.2	1072	115308	Neurofilament heavy polypeptide	0.93	1				2.04494	0.93	1
IPI:IPI00767856.2	1191	130794	similar to formin 3 CG33556-PA	0.92	1										2.38518	0.92	1
IPI:IPI00777039.1	996	113276	113 kDa protein	0.9	1	2.06473	0.9	1
IPI:IPI00782594.2	1013	115209	115 kDa protein	0.89	1				1.90777	0.89	1
IPI:IPI00948807.1	922	102731	103 kDa protein	0.87	5	2.06544	0.87	1	2.05083	0.87	1	1.84463	0.87	1	2.18455	0.87	1	2.1138	0.87	1
IPI:IPI00364744.3	1159	128931	VPS10 domain receptor protein SORCS 2	0.86	1				1.75934	0.86	1
IPI:IPI00768833.2	818	90470.9	91 kDa protein	0.86	1													1.79208	0.86	1
IPI:IPI00326436.3	1288	137634	5-oxoprolinase	0.85	1	2.83099	0.85	1							0	0		1.6539	0
IPI:IPI00560866.2	2040	0	similar to Absent in melanoma 1 protein	0.83	1													2.10513	0.83	1
IPI:IPI00361513.4	1639	0	similar to ATP-binding cassette transporter sub-family A member 9	0.79	1	1.97351	0.79	1
IPI:IPI00950495.1	896	99029.9	99 kDa protein	0.78	1	1.85507	0.78	1				0	0
IPI:IPI00480639.3	1663	186342	Complement C3 (Fragment)	0.72	1	2.07694	0.72	1
IPI:IPI00360075.2	1392	156554	Leucine-rich PPR motif-containing protein, mitochondrial	0.72	2	1.88066	0.72	1				2.08174	0.72	1				1.70844	0
IPI:IPI00364799.5	1941	221494	Myosin heavy chain 7B	0.72	1	1.63975	0		0	0		0	0					2.58492	0.72	1
IPI:IPI00930911.1	1966	221563	Isoform 2 of Sodium channel protein type 5 subunit alpha	0.71	1				2.53626	0.71	1
IPI:IPI00362817.3	1480	167929	hypothetical protein	0.68	1	1.90854	0.68	1	1.73815	0
IPI:IPI00365777.4	909	102310	102 kDa protein	0.66	3	1.91354	0.66	1				2.00599	0.66	1	2.00077	0.66	1	1.6854	0
IPI:IPI00949176.1	1215	136071	136 kDa protein	0.66	1										1.87659	0.66	1
IPI:IPI00554242.4	1546	175406	Jarid1a protein	0.58	1	2.06226	0.58	1
IPI:IPI00951875.1	1239	136926	137 kDa protein	0.56	1	3.43217	0.56	1
IPI:IPI00569166.2	1618	185810	Postsynaptic density protein	0.56	1							1.84809	0.56	1
IPI:IPI00366327.4	1296	143066	143 kDa protein	0.54	1	1.8231	0.54	1
IPI:IPI00370111.2	1182	127846	similar to zinc finger protein 609	0.51	1													1.82287	0.51	1
IPI:IPI00781872.2	1586	180713	similar to ankyrin repeat domain 26	0.5	1							1.81207	0.5	1				2.55362	0
IPI:IPI00476218.3	1448	158459	159 kDa protein	0.48	2										1.75974	0.48	1	1.81372	0.48	1
IPI:IPI00326140.3	1500	167019	Alpha-1-macroglobulin	0.47	1										2.03339	0.47	1
IPI:IPI00952365.1	1843	213716	214 kDa protein	0.43	1										1.76402	0.43	1
IPI:IPI00360801.4	2615	289613	similar to jumonji domain containing 1C	0.42	1	1.83139	0.42	1
IPI:IPI00211776.1	3187	364075	Rat GCP360	0.35	1	1.71319	0		1.69858	0		0	0		1.78639	0.35	1
IPI:IPI00944824.1	2583	274881	Fc fragment of IgG binding protein	0.35	2				1.82794	0.35	1							2.18019	0.35	1
IPI:IPI00767671.1	2052	235350	similar to Myosin heavy chain, cardiac muscle alpha isoform	0.34	1	1.89639	0.34	1
IPI:IPI00370846.2	2166	246097	similar to Serine/threonine-protein kinase ATR	0.28	1							0	0		1.817	0.28	1
IPI:IPI00951131.1	2444	275469	276 kDa protein	0.25	1	3.21507	0.25	1							1.57111	0		3.21451	0
IPI:IPI00780112.1	4586	505238	Rattus norvegicus (clone REM2) ORF	0.2	2	1.84579	0.2	1				4.13067	0		1.91301	0.2	1
